# Supplementary material for: Effects of Intermittent Hypoxia and Electrical Muscle Stimulation on Cognitive and Physiological Metrics
Source: MDPI journal article supplement (doi:10.3390/bioengineering10050536), 2023-04-27
Supplement: s1 [file s1]

# Effects of Intermittent Hypoxia and Electrical Muscle Stimulation on Cognitive and Physiological Metrics

Elizaveta Reganova <sup>1,2</sup>, Ksenia Solovyeva <sup>2,3</sup>, Dmitriy Buyanov <sup>4,5</sup>, Alexander Yu. Gerasimenko <sup>4,6,\*</sup> and Dmitry Repin <sup>7</sup>

<sup>1</sup> University of Genoa, Department of Informatics, Bioengineering, Robotics and System Engineering (DIBRIS) 16146 Genoa, Italy; lisa.reganova@gmail.com

<sup>2</sup> Functional Neurophysiology Laboratory, Autonomous Noncommercial Organization National Technology Initiative University 2035", 121205 Moscow, Russia; ks.p.solo@gmail.com (K.S.); dr@improbability.foundation (D.R.)

<sup>3</sup> Tri-Institutional Center for Translational Research in Neuroimaging and Data Science (TReNDS), Georgia Institute of Technology, The Georgia State University, Atlanta, GA 30303, USA

<sup>4</sup> Institute of Biomedical Systems, National Research University of Electronic Technology (MIET), Zelenograd, 124498 Moscow, Russia; buyancik@gmail.com

<sup>5</sup> Medical Computer Systems Ltd., Zelenograd, 124460 Moscow, Russia

<sup>6</sup> Institute for Bionic Technologies and Engineering, I.M. Sechenov First Moscow State Medical University, 119991 Moscow, Russia

<sup>7</sup> Improbability Foundation, Rue De-Candolle 19, CH-1205 Geneva, Switzerland

\* Correspondence: gerasimenko@bms.zone

**Table S1.** Changes in the values of biochemical and cognitive parameters. The group in which there was a significant change compared to the control group is highlighted in bold.

| Parameter               | Hypoxia               | Control        | EMS                   |
|-------------------------|-----------------------|----------------|-----------------------|
| Lactate, mmol/l         | <b>0.42 ± 0.17</b>    | −0.12 ± 0.23   | −0.04 ± 0.13          |
| MCV, fl                 | <b>−0.40 ± 0.29</b>   | 0.45 ± 0.31    | 0.30 ± 0.21           |
| Adrenalin, pg/ml        | <b>−3.53 ± 3.51</b>   | 6.04 ± 3.46    | 2.27 ± 2.88           |
| Serotonin, ng/ml        | <b>10.73 ± 10.47</b>  | −22.57 ± 13.38 | −13.0 ± 9.46          |
| Norepinephrine, pg/ml   | <b>−15.25 ± 27.45</b> | 86.21 ± 37.83  | <b>−21.02 ± 30.41</b> |
| Lymphocytes, %          | 0.72 ± 1.63           | 1.88 ± 0.89    | <b>−0.67 ± 0.91</b>   |
| LYM, 10 <sup>9</sup> /l | 0.03 ± 0.10           | 0.15 ± 0.14    | <b>−0.12 ± 0.10</b>   |
| Contextual Memory       | <b>140.2 ± 19.83</b>  | 50.5 ± 28.97   | 93.13 ± 15.48         |
| Short Term Memory       | <b>57.0 ± 28.43</b>   | 148.9 ± 28.6   | 160.73 ± 53.54        |
| Reaction Time           | 8.87 ± 38.73          | −73.3 ± 27.25  | <b>25.93 ± 53.0</b>   |
| Non verbal Memory       | 25.2 ± 27.83          | 1.4 ± 20.58    | <b>102.4 ± 45.14</b>  |
| Attention               | 214.14 ± 108.36       | 55.62 ± 49.76  | <b>−66.0 ± 65.83</b>  |

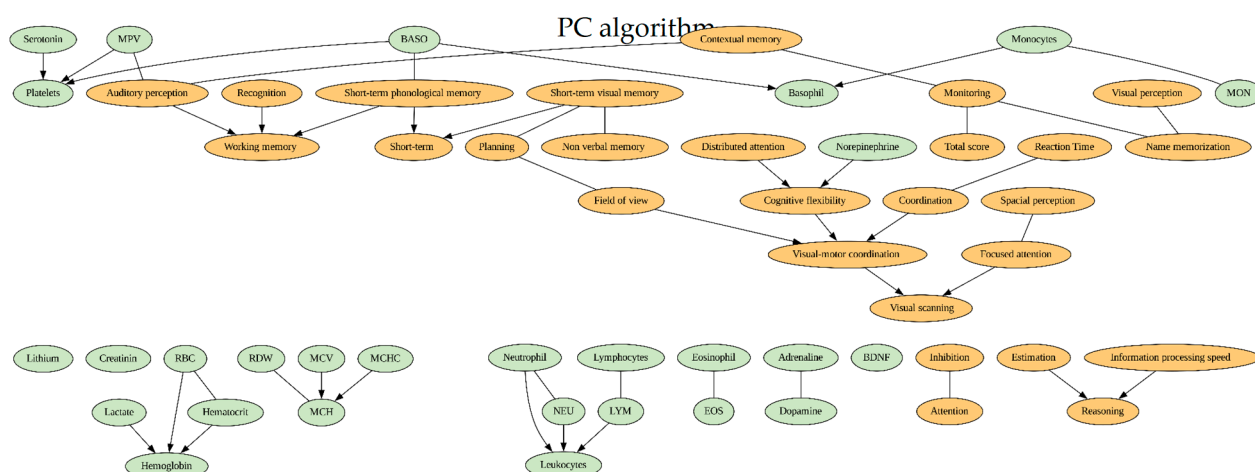

**Figure S1.** The result of causal analysis from PC algorithm from cognitive and biochemical parameters. Biochemical parameters - in green, cognitive parameters - in orange.

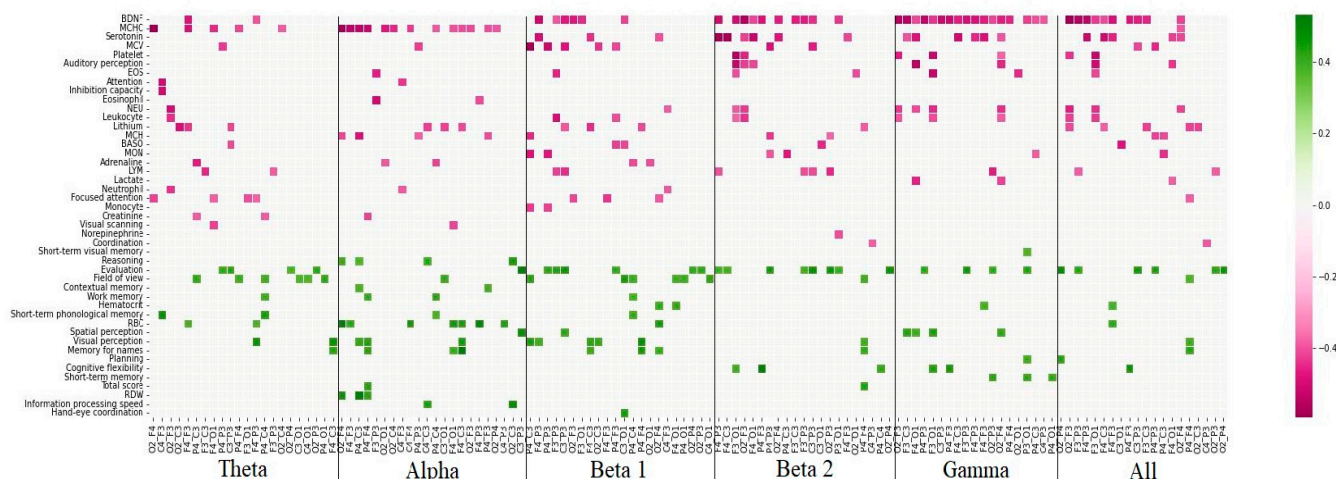

**Figure S2.** Spearman's rank correlation between cognitive/biochemical parameters and FC in open-eyes state before the experiment. FC calculated using the coherence method. Colors indicate the correlation coefficients.

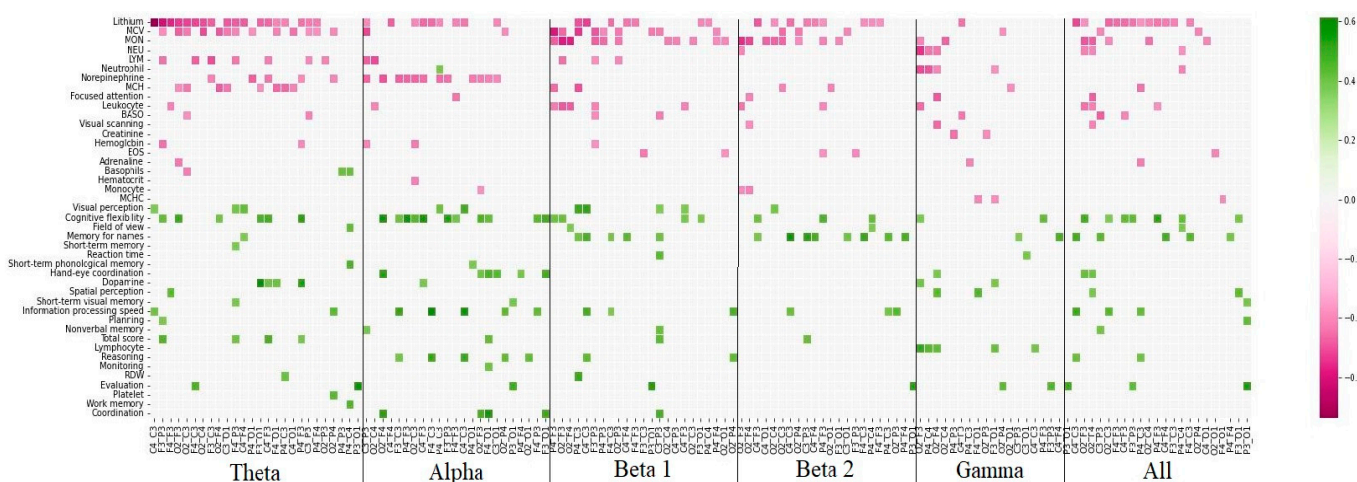

**Figure S2.** Spearman's rank correlation coefficient between cognitive/biochemical parameters and FC in closed-eyes state before experiment. FC calculated using the coherence method. Colors indicate the correlation coefficients.
